# Supplementary material for: A broadband cavity-enhanced spectrometer for atmospheric trace gas measurements and Rayleigh scattering cross sections in the cyan region (470–540 nm)
Source: Copernicus journal article supplement (doi:10.5194/amt-12-1277-2019), 2019-02-27
Supplement: Supplementary file 2 [file amt-12-1277-2019-supplement.zip]

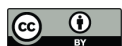

## *Supplement of*

# **A broadband cavity-enhanced spectrometer for atmospheric trace gas measurements and Rayleigh scattering cross sections in the cyan region (470–540 nm)**

**Nick Jordan et al.**

*Correspondence to:* Hans D. Osthoff ([hosthoff@ucalgary.ca](mailto:hosthoff@ucalgary.ca))

- [amt-12-1277-2019-supplement-title-page.pdf](#)
- [AMTD CEAS supplement 190130 - all accepted.pdf](#)
- [Rayleigh Scattering Cross Sections.xlsx](#)

The copyright of individual parts of the supplement might differ from the CC BY 4.0 License.
